# Supplementary material
Source: ML conference proceedings conference paper supplement (https://proceedings.neurips.cc/paper_files/paper/2019/hash/73c03186765e199c116224b68adc5fa0-Abstract.html)

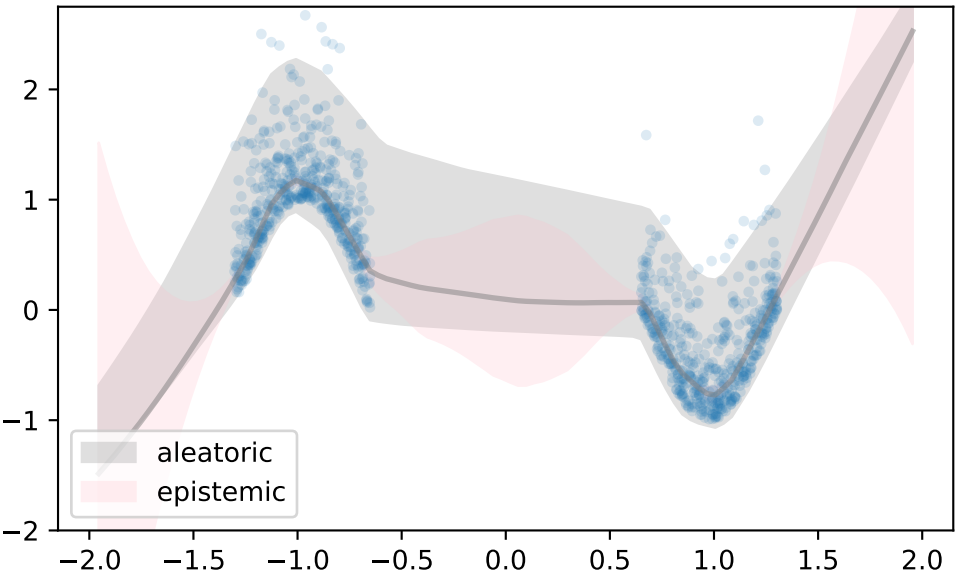

Supplement: Supplementary file [file 73c03186765e199c116224b68adc5fa0-Supplemental.zip]
